# Supplementary material for: Liver injury associated with the severity of COVID-19: A meta-analysis
Source: PubMed Central journal article supplement (PMC9932800; doi:10.3389/fpubh.2023.1003352), 2023-02-02
Supplement: Data_Sheet_1.pdf [file Data_Sheet_1.pdf]

Supplementary Table 1 Search strategy detailed in the meta-analysis.

| Electronic database | Search strategy                                                                                                                                                                                                                                                                                                                                                                                                                            | Results(n) |
|---------------------|--------------------------------------------------------------------------------------------------------------------------------------------------------------------------------------------------------------------------------------------------------------------------------------------------------------------------------------------------------------------------------------------------------------------------------------------|------------|
| PubMed              | (((hepatitis)[Title/Abstract] OR (liver disease))[Title/Abstract] OR (acute Liver Injury))[Title/Abstract] OR ((liver Injury) [Title/Abstract] AND (2019:2022[pdat])) AND (((covid-19) [Title/Abstract] OR (SARS-CoV-2))[Title/Abstract] OR (coronavirus) [Title/Abstract] AND (2019:2022[pdat]))) AND (((Pneumonia)[Title/Abstract] OR (Pulmonary Inflammation))[Title/Abstract] OR (Pneumonitis) [Title/Abstract] AND (2019:2022[pdat])) | 3891       |
| Embase              | [('coronavirus disease 2019'/exp) OR ('sars-cov-2':ab,ti) OR ('coronavirus':ab,ti)]AND [ ( 'pneumonia'/exp ) OR ( Pneumonitis ) OR ( Pulmonary Inflammation ) ]AND[ ( hepatitis ) OR(liver disease) OR (liver Injury)]                                                                                                                                                                                                                     | 449        |
| Cochrane Library    | (((liver Injury) OR (hepatitis)) OR (liver disease)) OR (acute Liver Injury)) AND (((covid-19) OR (SARS-CoV-2)) OR (coronavirus)) AND (((Pneumonia) OR (Pulmonary Inflammation)) OR (Pneumonitis))                                                                                                                                                                                                                                         | 122        |

Supplementary Table 2 Characteristics of the included studies in the meta-analysis.

| First author (year)  | Country | Study design | Samples (N)                                  | Sex N (%)                      | Mean (SD) Age (year) | Liver Function Test Mean (SD) or N (%)        |                                                            |                                                                 |                                                          | Death,N(%)   |            |          | Study Quality |
|----------------------|---------|--------------|----------------------------------------------|--------------------------------|----------------------|-----------------------------------------------|------------------------------------------------------------|-----------------------------------------------------------------|----------------------------------------------------------|--------------|------------|----------|---------------|
|                      |         |              |                                              |                                |                      | Total                                         | Severe Group                                               | Nonsevere Group                                                 | Total                                                    | Liver injury | Non-injury |          |               |
| Koichiro Abel (2020) | Japan   | RS           | Total: 22<br>Severe:2<br>Nonsevere: 20       | M: 13 (59)<br>F:9 (41)         | 47.8 (5.3)           | NA<br>NA<br>NA                                | NA<br>NA<br>NA                                             | NA<br>NA<br>NA                                                  | NA<br>NA<br>NA                                           | 2 (9)        | 1 (7)      | 1 (14)   | 6             |
| Ya-Wen An (2021)     | China   | PS           | Total: 253<br>Severe:58<br>Nonsevere: 195    | M: 113(44.7)<br>F:140 (55.3)   | 45.3(17.8)           | ALT:<br>AST:                                  | 34.6(49.4)<br>31.1(25.0)                                   | 44.2(51.0)<br>43.6(34.3)                                        | 32.0(48.8)<br>27.8(20.9)                                 | NA           | NA         | NA       | 7             |
| Deliang Huang (2020) | China   | PS           | Total: 318<br>Severe:85<br>Nonsevere: 233    | M: 198 (62.3)<br>F: 130 (37.7) | NA                   | ALT:<br>AST:<br>GGT:<br>TBIL:                 | 46(8.2)<br>38 (4)<br>47.5(9.2)<br>20(2.2)                  | 67(8.8)<br>58(8.7)<br>92(18)<br>22(1.7)                         | 41(7)<br>34(3)<br>40(6.2)<br>19(2.2)                     | NA           | NA         | NA       | 8             |
| Ze-yang Din (2021)   | China   | RS           | Total: 2073<br>Severe:200<br>Nonsevere: 1873 | M:1024 (49.4)<br>F: 1049(50.6) | 62(3.3)              | Live injury:<br>ALT:<br>AST:<br>TBIL:<br>GGT: | 297 (14.3%)<br>33(6.3)<br>30(4.5)<br>11.4(1.3)<br>37 (7.8) | 103 (51.5%)<br>48(9.5)<br>68(16.9)<br>22.05(3.2)<br>69.5 (13.8) | 94 (10.4%)<br>48(9.5)<br>68(16.9)<br>11(1.1)<br>35 (7.2) | 200(9.6)     | 185 (92.5) | 15(7.5)  | 8             |
| Yu Fu (2020)         | China   | RS           | Total: 482<br>Severe:188<br>Nonsevere: 294   | M:243 (50.4)<br>F: 239 (49.6)  | 56.5(4.7)            | Live injury:                                  | 142(29.5%)                                                 | 75(39.9%)                                                       | 67 (22.8%)                                               | 64 (13.3)    | 42 (29.6)  | 22 (6.5) | 6             |

Supplementary Table 2 (continued)

|                         |          |    |                                            |                                |            |                                                       |                                                                                      |                                                                                       |                                                                                  |    |    |    |   |
|-------------------------|----------|----|--------------------------------------------|--------------------------------|------------|-------------------------------------------------------|--------------------------------------------------------------------------------------|---------------------------------------------------------------------------------------|----------------------------------------------------------------------------------|----|----|----|---|
| Kuniyo Gomi (2021)      | Japan    | RS | Total: 210<br>Severe:7<br>Nonsevere:203    | M:119(56.7)<br>F: 91(43.3)     | 49(21)     | Live injury:<br>ALT:<br>AST:<br>GGT:<br>ALB:          | 124(59%)<br>27(26.8)<br>30.1(28)<br>33.3(53.3)<br>38.6(6)                            | 5 (71.4%)<br>55.3(17.9)<br>61.5(18.5)<br>99.8(84)<br>28(6.4)                          | 119(58.6%)<br>26(26.5)<br>29(27.8)<br>31(50.7)<br>39(5.7)                        | NA | NA | NA | 7 |
| Shao-Ru i Hao,MD (2021) | China    | RS | Total:788<br>Severe:78<br>Nonsevere: 710   | M:407(51.6)<br>F: 381 (48.4)   | NA         | Live injury:                                          | 222(28.2%)                                                                           | 20 (25.6%)                                                                            | 202(28.5)                                                                        | NA | NA | NA | 6 |
| Haijun Huang (2021)     | China    | RS | Total:675<br>Severe:152<br>Nonsevere:523   | M: 313(46.3)<br>F: 362(53.9)   | 55(4.8)    | Live injury:                                          | 305(45.2%)                                                                           | 104 (68.4%)                                                                           | 201(38.4)                                                                        | NA | NA | NA | 6 |
| Wei Huang (2020)        | China    | RS | Total:2623<br>Severe:615<br>Nonsevere:2008 | M:1323 (50.4)<br>F:1300 (49.6) | 62.3(4.2)  | ALT:<br>AST:<br>TBIL:<br>GGT:<br>ALB:<br>PT:<br>APTT: | 24.4(4.5)<br>25.6(5.7)<br>9(1.9)<br>31.6(7.8)<br>34.3(2.5)<br>13.8(0.8)<br>38.6(1.4) | 25.5(4.9)<br>31(8.8)<br>11.7(2.1)<br>39.9(9.3)<br>30.4(1.6)<br>14.9(1.1)<br>38.7(2.1) | 24(4.3)<br>24(2.7)<br>8.3(0.9)<br>29(5)<br>35.5(1.01)<br>13.5(0.15)<br>38.6(1.1) | NA | NA | NA | 7 |
| Melanie A. Hundt (2020) | Netwo rk | RS | Total:1827<br>Severe:652<br>Nonsevere:1175 | M: 969 (53.0)<br>F: 858(47)    | 64.6(18.2) | ALT:<br>AST:<br>TBIL:<br>ALB:                         | 29(304.3)<br>42(507.7)<br>8.6(25.1)<br>35(7)                                         | 28(304.3)<br>51(507)<br>8.6(25.1)<br>33(6)                                            | 31(239.2)<br>38(231.8)<br>6.8(22.5)<br>35(6.8)                                   | NA | NA | NA | 7 |

Supplementary Table 2 (continued)

|                        |       |    |                                             |                                 |            |                                                                        |                                                                                                                   |                                                                                                                 |                                                                                                              |    |    |    |   |
|------------------------|-------|----|---------------------------------------------|---------------------------------|------------|------------------------------------------------------------------------|-------------------------------------------------------------------------------------------------------------------|-----------------------------------------------------------------------------------------------------------------|--------------------------------------------------------------------------------------------------------------|----|----|----|---|
| Fang Lei<br>(2020)     | China | RS | Total:5771<br>Severe:1186<br>Nonsevere:4585 | M:2724 (47.2)<br>F: 3047 (52.8) | 56.5(3.7)  | CLD%:<br>ALT:<br>AST:<br>TBIL:<br>ALB:                                 | 81 (1.4%)<br>24(4.0)<br>24(3)<br>10.4(1)<br>37.5(1.1)                                                             | 25 (2.1%)<br>26(4.7)<br>31(4.2)<br>10.6(1.2)<br>35.7(1.1)                                                       | 56 (1.2%)<br>23(3.8)<br>22(2.3)<br>10.3(1)<br>38(1.03)                                                       | NA | NA | NA | 7 |
| M. Lei<br>N.<br>(2021) | China | RS | Total:288<br>Severe:32<br>Severe:32         | M: 131 (45.5)<br>F: 157 (54.5)  | 43.9 (8.3) | ALT:<br>AST:<br>TBIL:<br>GGT:<br>ALB:<br>PT:<br>APTT:<br>INR:<br>CLD%: | 22.5 (3.4)<br>18.4(1.8)<br>9.8(1.7)<br>17(5.8)<br>37.1(2.7)<br>13.5(0.45)<br>35.1(1.6)<br>1.01(0.02)<br>10 (3.5%) | 45.8 (8.8)<br>24.8(5.5)<br>10.7(1.8)<br>21(5.7)<br>34.7(1.5)<br>13.6(0.5)<br>36.6(1.9)<br>1.03(0.5)<br>2 (6.3%) | 21.3 (3)<br>17.7(1.7)<br>9.4(0.9)<br>16(6.8)<br>39.6(2.6)<br>13.2(0.5)<br>34.9(1.7)<br>0.98(0.3)<br>8 (3.1%) | NA | NA | NA | 8 |
| Shasha<br>Li(2020)     | China | PS | Total: 159<br>Severe:34<br>Nonsevere:125    | M:90 (56.6)<br>F:69 (43.4)      | 38.5(4.9)  | Live<br>injury:<br>ALT:<br>AST:<br>TBIL:<br>ALB:<br>CLD%:              | 28(17.6%)<br>27 (7.3)<br>24.8(3.3)<br>16.7(3.1)<br>39(2)<br>3(1.9%)                                               | 11 (32.4%)<br>57.6(8.2)<br>39.8(12.7)<br>19.3(4)<br>35.5(3.8)<br>2(5.9%)                                        | 17 (13.6%)<br>22.75(5.2)<br>23.6(1.9)<br>16(2.4)<br>39.7(2.4)<br>1(0.8%)                                     | NA | NA | NA | 7 |
| Liu<br>Chuan<br>(2020) | China | RS | Total: 32<br>Severe:4<br>Nonsevere:28       | M:20 (62.5)<br>F:12 (37.5)      | 38.6(5)    | ALT:<br>AST:<br>TBIL:<br>ALB:                                          | 27 (7.3)<br>24.75(3.3)<br>16.5(2.9)<br>39.5 (2.5)                                                                 | 60.25(7)<br>37(10.9)<br>20.5(3.4)<br>35.75 (3.3)                                                                | 22.8(5.2)<br>23.6(1.9)<br>15.95(2.4)<br>39.7(2.4)                                                            | NA | NA | NA | 8 |

Supplementary Table 2 (continued)

|                                 |        |    |                                          |                             |             |                                                                               |                                                                                                                    |                                                                                                                        |                                                                                                                |           |          |         |   |
|---------------------------------|--------|----|------------------------------------------|-----------------------------|-------------|-------------------------------------------------------------------------------|--------------------------------------------------------------------------------------------------------------------|------------------------------------------------------------------------------------------------------------------------|----------------------------------------------------------------------------------------------------------------|-----------|----------|---------|---|
| Jianrong Liu (2021)             | China  | RS | Total:58<br>Severe:12<br>Nonsevere:46    | M:30 (51.7)<br>F:28 (48.3)  | 65.1 (14.2) | Live injury:<br>ALT:<br>AST:<br>TBIL:<br>GGT:<br>ALB:<br>PT:<br>APTT:<br>INR: | 30 (51.7%)<br>21.6 (8.9)<br>22.8 (5)<br>9.4 (2.6)<br>32(20.6)<br>37.1(2.2)<br>13.4(0.4)<br>37.8(2.9)<br>1.03(0.04) | 10 (33.3%)<br>31.8 (11.4)<br>29.8 (6.7)<br>12.3 (3.4)<br>66.3(19)<br>34.2(2.3)<br>13.8(0.3)<br>34.8(4.6)<br>1.07(0.03) | 20 (43.6%)<br>19 (5.8)<br>21 (2)<br>8.6 (1.6 )<br>23(7.3)<br>37.8(1.4)<br>13.3(0.3)<br>38.6(1.5)<br>1.02(0.03) | NA        | NA       | NA      | 8 |
| Magdalena Meszaros (2020)       | France | RS | Total:234<br>Severe:114<br>Nonsevere:120 | M:149 (63.7)<br>F:85 (36.3) | 67(14)      | Live injury                                                                   | 156(66.7%)                                                                                                         | 89 (78.1%)                                                                                                             | 67(55.8)                                                                                                       | 37 (15.8) | 31(19.9) | 6 (7.7) | 6 |
| Fernanda Manhães Pozzobon(2021) | Brazil | PS | Total:406<br>Severe:149<br>Nonsevere:257 | M:231 (57)<br>F:175 (43)    | 56(3.3)     | ALT:<br>AST:                                                                  | 38(6.2)<br>37(5)                                                                                                   | 48(7)<br>49(7.5)                                                                                                       | 35(5.3)<br>34(3.5)                                                                                             | NA        | NA       | NA      |   |
| Z.P. Qian (2020)                | China  | RS | Total:324<br>Severe:26<br>Nonsevere:298  | M:167(51.5)<br>F:157(48.5)  | 51(12.2)    | ALT:<br>AST:<br>TBIL:<br>GGT:<br>ALB:<br>CLD%:                                | 21.86(3.14)<br>23.9(4.13)<br>8.3(1.1)<br>24.3(5.18)<br>40.6(4.13)<br>20(6.2%)                                      | 26(3.9)<br>34 (6.9)<br>10.75(1.6)<br>28(10.6)<br>35.79(4.75)<br>2(7.7%)                                                | 21.5(2.8)<br>23(2.2)<br>8.05(0.7)<br>24(4.3)<br>41.07(3.8)<br>18(6%)                                           | NA        | NA       | NA      | 6 |

Supplementary Table 2 (continued)

|                                |       |    |                                         |                                         |           |                                                        |                                                                                          |                                                                                         |                                                                                         |        |         |         |   |
|--------------------------------|-------|----|-----------------------------------------|-----------------------------------------|-----------|--------------------------------------------------------|------------------------------------------------------------------------------------------|-----------------------------------------------------------------------------------------|-----------------------------------------------------------------------------------------|--------|---------|---------|---|
| Fei Zhou<br>(2020)             | China | RS | Total:191<br>Severe:54<br>Nonsevere:137 | M:119 (62)<br>F:72 (38)                 | 56(3.5)   | ALT:<br>ALB:<br>PT:                                    | 30(4.8)<br>32.3(1)<br>11.6(0.4)                                                          | 40(0.8)<br>29.1(1.2)<br>12.1(0.6)                                                       | 27(4.2)<br>33.6(1)<br>11.4(0.4)                                                         | NA     | NA      | NA      | 6 |
| Yoshihit<br>o Uchida<br>(2020) | China | RS | Total:35<br>Severe:8<br>Nonsevere:27    | M:22 (62.9)<br>F:13 (37.1))             | 52(15.75) | ALT:<br>AST:<br>TBIL:<br>GGT:                          | 38(57.25)<br>34(51.5)<br>12(39.8)<br>37(121)                                             | 104.3(64.3)<br>104.5(56.4)<br>53.43(48.2)<br>203(140)                                   | 29(52.5)<br>31(45.5)<br>10.3(6.4)<br>30(85)                                             | NA     | NA      | NA      | 6 |
| Suxin<br>Wan<br>(2020)         | China | PS | Total:135<br>Severe:40<br>Nonsevere:95  | M:72 (53.3)<br>F: 63 (46.7)             | 47(3.2)   | ALT:<br>AST:<br>TBIL:<br>ALB:<br>PT:<br>APTT:<br>CLD%: | 26(3.38)<br>33.4(2.65)<br>8.6(1.3)<br>40.5(1.07)<br>10.9(0.15)<br>26.9(0.72)<br>2 (1.5%) | 26.6(4.7)<br>33.6(4.63)<br>9.8(1.95)<br>36(1.38)<br>11.3(0.28)<br>29.7(4.2)<br>1 (2.5%) | 21.7(3.68)<br>22.4(2.3)<br>8.6(1.4)<br>49.9(1.03)<br>10.8(0.15)<br>26.6(0.72)<br>1 (1%) | NA     | NA      | NA      | 7 |
| Yijin<br>Wang<br>(2020)        | China | PS | Total:156<br>Severe:54<br>Nonsevere:102 | M:82(52.6)<br>F:74(47.4)<br>M:56 (53.3) | 51.2(16)  | Live<br>injury                                         | 64(42%)                                                                                  | 30 (55.6%)                                                                              | 34 (33.3%)                                                                              | 4(2.6) | 3 (4.7) | 1 (1.1) | 6 |
| Qi Wang<br>(2020)              | China | RS | Total:105<br>Severe:26<br>Nonsevere:79  | F:49 (46.7)                             | 45(4.3)   | ALT:<br>AST:<br>TBIL:<br>ALB:                          | 23.5(3.7)<br>24.2(3.8)<br>10.2(1.4)<br>41.6(1.7)                                         | 27.8(4.8)<br>43.1(8.5)<br>10.6(1.3)<br>37.6(2.2)                                        | 22(3.4)<br>22(3.3)<br>10(1.5)<br>42(1.7)                                                | NA     | NA      | NA      | 8 |
| M. Wen<br>(2020)               | China | RS | Total:110<br>Severe:14<br>Nonsevere:96  | M:59 (53.6)<br>F:51 (46.4)              | NA        | ALT:<br>AST:<br>TBIL:<br>ALB:                          | 34.15(15.3)<br>31.89(6.3)<br>16.7(2.1)<br>35.8(2.8)                                      | 66.04(23)<br>45.87(5.9)<br>18.05(2.52)<br>28.57(0.7)                                    | 29.5(4.8)<br>29.85(2.7)<br>16.55(2)<br>36.76(0.94)                                      | NA     | NA      | NA      | 8 |

Supplementary Table 2 (continued)

|                            |       |    |                                         |                             |            |                                               |                                                                             |                                                                                           |                                                                                          |           |         |          |   |
|----------------------------|-------|----|-----------------------------------------|-----------------------------|------------|-----------------------------------------------|-----------------------------------------------------------------------------|-------------------------------------------------------------------------------------------|------------------------------------------------------------------------------------------|-----------|---------|----------|---|
| Hanshen<br>g Xie<br>(2020) | China | RS | Total:79<br>Severe:28<br>Nonsevere:51   | M:44(55.7)<br>F:35(44.3)    | 60(3)      | ALT:<br>AST:<br>TBIL:<br>GGT:                 | 34(8.2)<br>30(4.5)<br>13.6(1.5)<br>31.5(10.4)                               | 36.5(13.5)<br>35(7.5)<br>12.7(1.83)<br>35.5(14.75)                                        | 30(5.63)<br>28(5)<br>13.9(2.45)<br>25.5(19.7)                                            | NA        | NA      | NA       | 7 |
| N. Yao<br>(2020)           | China | RS | Total:40<br>Severe:22<br>Nonsevere:18   | M:24(60)<br>F:16(40)        | NA         | Live<br>injury:                               | 22(55%)                                                                     | 17(77.3%)                                                                                 | 4(22.2%)                                                                                 | NA        | NA      | NA       | 6 |
| Xiaomei<br>Yu<br>(2021)    | China | RS | Total:330<br>Severe:232<br>Nonsevere:98 | M:163(49.4)<br>F:167(50.6)  | 68.3(2)    | Live<br>injury:                               | 96(29.1%)                                                                   | 76(32.8%)                                                                                 | 20(20.4%)                                                                                | 65 (19.7) | 23 (24) | 42(17.9) | 6 |
| Qing-Lei<br>Zeng<br>(2021) | China | RS | Total:70<br>Severe:40<br>Nonsevere:30   | M:46 (65.7)<br>F:24 (34.3)  | 56.5(8)    | CLD%:                                         | 13 (18.6%)                                                                  | 7 (17.5%)                                                                                 | 6 (20%)                                                                                  | NA        | NA      | NA       | 6 |
| Hu<br>Zhang<br>(2020)      | China | RS | Total:218<br>Severe:38<br>Nonsevere:180 | M:94 (43.1)<br>F:124 (56.9) | 50.1(18.3) | Live<br>injury:                               | 79(36.2%)                                                                   | 21 (55.3%)                                                                                | 58(32.2%)                                                                                | NA        | NA      | NA       | 6 |
| Yafei<br>Zhang<br>(2020)   | China | RS | Total:115<br>Severe:31<br>Nonsevere:84  | M:49(42.6)<br>F:66(57.4)    | 49.5(17.1) | ALT:<br>AST:<br>TBIL:<br>GGT:<br>ALB:<br>INR: | 25.7(21.1)<br>28.3(15.7)<br>11.3(5.2)<br>36.1(45)<br>38.8(4.4)<br>1.17(0.1) | 37.87(32.17)<br>38.87 (22.55)<br>14.12(6.37)<br>56.90(73.28)<br>34.40(4.11)<br>1.21(0.13) | 21.22(12.67)<br>24.39(9.79)<br>10.27 (4.26)<br>28.47(24.93)<br>40.41(3.24)<br>1.15(0.09) | NA        | NA      | NA       | 7 |

Supplementary Table 2 (continued)

|                            |       |    |                                           |                               |              |                                                                        |                                                                                                       |                                                                                                          |                                                                                                       |        |        |       |   |
|----------------------------|-------|----|-------------------------------------------|-------------------------------|--------------|------------------------------------------------------------------------|-------------------------------------------------------------------------------------------------------|----------------------------------------------------------------------------------------------------------|-------------------------------------------------------------------------------------------------------|--------|--------|-------|---|
| Guang<br>Chen<br>(2020)    | China | RS | Total:21<br>Severe:11<br>Nonsevere:10     | M:17 (81.0)<br>F:4(19)        | 56.75(3.75 ) | ALT:<br>AST:<br>TBIL:<br>ALB:<br>PT:<br>APTT:                          | 27.5(6.5)<br>30.5(6.5)<br>8.7(0.9)<br>33.6(1.95)<br>13.7(0.4)<br>39(2.7)                              | 41.6(5.1)<br>49.1(13.5)<br>9(0.8)<br>30.2(1.3)<br>14.2(0.3)<br>34.5(1.9)                                 | 16.8(2.5)<br>24(1.4)<br>7.9(0.9)<br>30.2(1.3)<br>13.3(0.3)<br>44.6(1.5)                               | NA     | NA     | NA    | 7 |
| Qingxia<br>n Ca<br>(2020)  | China | PS | Total:298<br>Severe: 58<br>Nonsevere: 240 | M:145 (48.66)<br>F:153(51.34) | 47.5(4.7)    | Live<br>injury<br>CLD%:<br>ALT:<br>AST:<br>TBIL:<br>GGT:               | 44 (14.8%)<br>28 (9.4%)<br>37(3.2)<br>34(3.5)<br>16.2(1.7)<br>37.8(3.2)                               | 21 (36.2%)<br>8 (13.79%)<br>42(12.5)<br>38(10.6)<br>20.7(3.2)<br>47(30.3)                                | 23 (9.1%)<br>20 (8.33%)<br>30(2.7)<br>28(3)<br>13.5(1.6)<br>33.6(3.5)                                 | NA     | NA     | NA    | 8 |
| Tao<br>Chen<br>(2020)      | China | RS | Total:274<br>Severe113<br>Nonsevere161    | M:171 (62.4)<br>F:103 (37.6)  | 62(4.3)      | CLD%:<br>ALT:<br>AST:<br>TBIL:<br>GGT:<br>ALB:<br>PT:<br>APTT:<br>INR: | 11 (4%)<br>23(3.8)<br>30(4)<br>9.6(1.13)<br>33(5)<br>33.9(1.2)<br>14.3(0.3)<br>30.8(1.3)<br>1.1(0.03) | 6 (5.3%)<br>28(4.8)<br>45(6)<br>12.6(1.2)<br>42(7.2)<br>30.1(0.9)<br>15.5(0.5)<br>40.6(1.9)<br>1.2(0.05) | 5 (3.1%)<br>20(2.9)<br>25(2.3)<br>8.4(0.9)<br>28(4.4)<br>36.3(1)<br>13.9(0.2)<br>41(1.2)<br>1.1(0.02) | NA     | NA     | NA    | 8 |
| Chaolin<br>Huang<br>(2020) | China | PS | Total:41<br>Severe:13<br>Nonsevere:28     | M:30 (73)<br>F:11 (27)        | 49(4.3)      | CLD%:<br>ALT:<br>AST:<br>TBIL:<br>ALB:                                 | 1 (2%)<br>32(7.3)<br>34(5.5)<br>11.7(1.1)<br>31.4(1.8)                                                | 0<br>60.5(25.7)<br>47(11.7)<br>18.2(6.5)<br>28.3(1.3)                                                    | 1 (4%)<br>27(5.1)<br>34(4.1)<br>10.8(0.7)<br>34.7(1.6)                                                | 6 (15) | 5 (38) | 1 (4) | 8 |



Supplementary Table 2 (continued)

|                                  |                  |    |                                           |                               |             |                |             |             |             |    |    |    |   |
|----------------------------------|------------------|----|-------------------------------------------|-------------------------------|-------------|----------------|-------------|-------------|-------------|----|----|----|---|
|                                  |                  |    |                                           |                               |             | PT:            | 11.1(0.6)   | 12.3(0.6)   | 10.7(0.6)   |    |    |    |   |
|                                  |                  |    |                                           |                               |             | APTT:          | 27(2.5)     | 27.2(3.3)   | 27.7(2.3)   |    |    |    |   |
| Pingzhe<br>ng Mo<br>(2021)       | China            | RS | Total:155<br>Severe:85<br>Nonsevere:70    | M:86 (55.5)<br>F:69(44.5)     | 54(4)       | CLD%:          | 7 (4.5%)    | 5 (5.9%)    | 2 (2.9%)    | NA | NA | NA | 7 |
|                                  |                  |    |                                           |                               |             | ALT:           | 23(3.7)     | 28(4.2)     | 20(4.5)     |    |    |    |   |
|                                  |                  |    |                                           |                               |             | AST:           | 32(4)       | 37(6.7)     | 32(3.8)     |    |    |    |   |
|                                  |                  |    |                                           |                               |             | ALB:           | 38(1.2)     | 36(1.3)     | 39(1.5)     |    |    |    |   |
| Dawei<br>Wang<br>(2020)          | China            | RS | Total:138<br>Severe:36<br>Nonsevere:102   | M:75 (54.3)<br>F:63 (45.7)    | 56(4.3)     | CLD%:          | 4 (2.9%)    | 0           | 4 (3.9%)    | NA | NA | NA | 7 |
|                                  |                  |    |                                           |                               |             | ALT:           | 24(4.0)     | 35(9.5)     | 23(3.5)     |    |    |    |   |
|                                  |                  |    |                                           |                               |             | AST:           | 31(4.5)     | 52(10)      | 29(2.8)     |    |    |    |   |
|                                  |                  |    |                                           |                               |             | TBIL:          | 9.8(0.95)   | 11.5(2.3)   | 9.3(0.8)    |    |    |    |   |
|                                  |                  |    |                                           |                               |             | PT:            | 13(0.2)     | 13.2(0.55)  | 12.9(0.2)   |    |    |    |   |
|                                  |                  |    |                                           |                               |             | APTT:          | 31.4(0.7)   | 30.4(1.4)   | 31.7(0.7)   |    |    |    |   |
| Xiaobo<br>Yang<br>(2020)         | China            | RS | Total:52<br>Severe:20<br>Nonsevere:32     | M:35 (67)<br>F:17 (33)        | 59.7(13.3)  | Live<br>injury | 15 (29%)    | 9 (28%)     | 6 (30%)     | NA | NA | NA | 6 |
|                                  |                  |    |                                           |                               |             | TBIL:          | 17(10)      | 12.9(2.9)   | 13.1(4.3)   |    |    |    |   |
|                                  |                  |    |                                           |                               |             | PT:            | 12.1(3)     |             | 10.9(2.7)   |    |    |    |   |
| Maria<br>Effenber<br>ge<br>2021  | Austria          | PS | Total: 96<br>Severe:15<br>Nonsevere: 81   | M:60(62.5)<br>F:36 (37.5)     | 60.7(18.9)  | ALT:           | 28(12.6)    | 4.93(24.83) | 25(4.2)     | NA | NA | NA | 7 |
|                                  |                  |    |                                           |                               |             | AST:           | 37.2(11.56) | 54.7(18.4)  | 34(5.6)     |    |    |    |   |
|                                  |                  |    |                                           |                               |             | GGT:           | 40(10)      | 50.75(16)   | 38(7)       |    |    |    |   |
| Shambel<br>Araya<br>2022         | Ethiopia         | PS | Total: 440<br>Severe:62<br>Nonsevere: 378 | M:270 (61.3)<br>F:170 (38.7)  | 60.3( 1.3)  | ALT:           | 59(63)      | 59.9(58.7)  | 49.26(43.9) | NA | NA | NA | 7 |
|                                  |                  |    |                                           |                               |             | AST:           | 57(53)      | 66.5(65)    | 47.39(35.3) |    |    |    |   |
| Carla<br>Diaz-Lo<br>uzao<br>2022 | United<br>States | RS | Total: 440<br>Severe:62<br>Nonsevere: 378 | M:120 (56.60)<br>F:97 (43.40) | 68.4( 3.43) | CLD%           | 13(3%)      | 0           | 13 (7.4%)   | NA | NA | NA | 7 |
|                                  |                  |    |                                           |                               |             | ALT:           | 35(6.5)     | 31(11.5)    | 36(6.75)    |    |    |    |   |
|                                  |                  |    |                                           |                               |             | AST:           | 30(3.8)     | 37(8.75)    | 29(3.3)     |    |    |    |   |
|                                  |                  |    |                                           |                               |             | GGT:           | 45(10)      | 59(18.25)   | 44(9)       |    |    |    |   |

Supplementary Table 2 (continued)

|                            |               |    |                                               |                               |             |                                                       |                                                                                             |                                                                                 |                                                                                  |    |    |    |   |
|----------------------------|---------------|----|-----------------------------------------------|-------------------------------|-------------|-------------------------------------------------------|---------------------------------------------------------------------------------------------|---------------------------------------------------------------------------------|----------------------------------------------------------------------------------|----|----|----|---|
| Noha M. Elemam 2022        | United States | RS | Total: 440<br>Severe:62<br>Nonsevere: 378     | M:29 (78.4)<br>F:8 (21.6)     | 51.95( 14)  | ALT:<br>AST:<br>ALB:<br>PT:<br>APTT:                  | 116.45(200.2)<br>133.7(232.3)<br>30.9(7.47)<br>15.04(1.89)<br>42.38(8.19)                   | 115.1(226.6)<br>188(308.2)<br>28.3(9.3)<br>15.49(2.28)<br>45.44(9.27)           | 117.57(180.8)<br>87.47(131.72)<br>33.2(4.6)<br>14.65(1.43)<br>39.77(6.25)        | NA | NA | NA | 8 |
| Arunku mar Krishnan 2022   | United States | RS | Total: 3830<br>Severe:1354<br>Nonsevere: 2476 | M:1959 (51.1)<br>F:1871(48.9) | 64.2(4.6)   | ALT:<br>AST:<br>TBIL:<br>GGT:<br>ALB:<br>PT:<br>APTT: | 28(4.8)<br>36.83(6.3)<br>8.5(16.53)<br>126.08(25.36)<br>38.6(1.2)<br>11.1(0.2)<br>26.2(5.2) | 30(5)<br>42(5.8)<br>8.5(18.8)<br>144.5(31)<br>39(1.2)<br>11.4(0.3)<br>25.7(5.4) | 27(4.5)<br>34(4.6)<br>6.8(16.25)<br>116(13.5)<br>36(1.3)<br>10.9(0.2)<br>25.9(5) | NA | NA | NA | 8 |
| Farhad Shaveisi-Zadeh 2022 | Iran          | RS | Total: 77<br>Severe:20<br>Nonsevere: 57       | M:35(45.5)<br>F:42(54.5)      | 61.6( 17.8) | ALT:<br>AST:<br>PT:<br>APTT:                          | 77.7(258.8)<br>139.5(588.5)<br>12.77(1.95)<br>38(24.7)                                      | 82.2(146.98)<br>132.5(261.8)<br>12.7(0.83)<br>37.33(7.2)                        | 76.1(289.1)<br>141.98(668.4)<br>12.79(2.22)<br>38.29(28.52)                      | NA | NA | NA | 7 |
| Mehmet Tahir Huyut 2022    | Türkiye       | RS | Total: 4597<br>Severe:233<br>Nonsevere: 4364  | M:2371(51.6)<br>F:2226(48.4)  | 57(6.3)     | ALT:<br>AST:<br>TBIL:<br>PT:<br>APTT:                 | 31.6(7.6)<br>27.7(3.6)<br>8.5(1)<br>13.2(0.5)<br>35.1(1.6)                                  | 24(5.17)<br>32(5.7)<br>10.6(1.4)<br>14.83(0.45)<br>31(0.3)                      | 32(7.5)<br>27.5(3.3)<br>8.38(0.88)<br>13.1(0.25)<br>35.34(1.31)                  | NA | NA | NA | 8 |
| L. Xu M. 2022              | China         | RS | Total: 111<br>Severe:40<br>Nonsevere: 71      | M:61 (55)<br>F:50 (45)        | 69(3.7)     | Live injury<br>CLD%:<br>ALT:<br>AST:                  | 86 (77.5%)<br>6 (5.4%)<br>29.6(4.7)<br>27.7(5.7)                                            | 34 (85%)<br>1 (2.5%)<br>29(5.9)<br>32.5(6.4)                                    | 52 (73.2%)<br>5 (7%)<br>30(3.8)<br>25(2.7)                                       | NA | NA | NA | 8 |

Supplementary Table 2 (continued)

|      |       |    |                |           |        |        |             |             |           |    |    |    |   |
|------|-------|----|----------------|-----------|--------|--------|-------------|-------------|-----------|----|----|----|---|
|      |       |    |                |           |        | TBIL:  | 12.2(1.9)   | 13.75(1.98) | 11.3(1.2) |    |    |    |   |
|      |       |    |                |           |        | GGT:   | 29.6(7.7)   | 36(8.75)    | 26(3.8)   |    |    |    |   |
|      |       |    |                |           |        | ALB:   | 33.7(1.9)   | 32(2)       | 34.6(1)   |    |    |    |   |
| Wei  | China | RS | Total: 157     | M:88 (56) | 45(18) | Live   | 20 (1.7%)   | 8 (5.3%)    | 12 (8.5%) | NA | NA | NA | 8 |
| Zhao |       |    |                |           |        | injury |             |             |           |    |    |    |   |
| 2022 |       |    | Severe:15      | F:69 (44) |        | CLD%:  | 1.27 (5.4%) | 0           | 1.4 (7%)  |    |    |    |   |
|      |       |    | Nonsevere: 142 |           |        | ALT:   | 22.4(8)     | 45.5(6.23)  | 20(1.9)   |    |    |    |   |
|      |       |    |                |           |        | AST:   | 23.6(5.5)   | 38.75(6.1)  | 22(1.7)   |    |    |    |   |
|      |       |    |                |           |        | TBIL:  | 7.8(1.6)    | 9.25(1.45)  | 7.7(1.5)  |    |    |    |   |
|      |       |    |                |           |        | ALB:   | 37(4.8)     | 43.1(5.4)   | 36.6(4.3) |    |    |    |   |

Note: CLD: chronic liver disease; ALT: alanine aminotransferase; AST: aspartate aminotransferase; GGT: gamma-glutamyl transferase; TBIL: total bilirubin; ALB: albumin; PT:

prothrombin time; APTT: activated partial thromboplastin time; INR: International Normalized Ratio; RS: retrospective study; PS: prospective study.

Supplementary Table 3 Meta-analysis of liver injury parameters in COVID-19 patients

| Parameter           | No.     | No.      | Heterogeneity |                | Model  | Meta-analysis       |
|---------------------|---------|----------|---------------|----------------|--------|---------------------|
|                     | studies | patients | P             | I <sup>2</sup> |        | WMD or OR (95%CI)   |
| Live injury (%)     | 16      | 6041     | 0.000         | 82.3%          | Random | 3.25(2.19,4.84)     |
| transaminase >3 ULN |         |          |               |                |        |                     |
| CLD%                | 17      | 12138    | 0.329         | 10.7%          | Random | 1.38(1.08,1.77)     |
| ALT level (U/L)     | 35      | 25596    | 0.000         | 99.2%          | Random | 12.87(10.52,15.23)  |
| AST level (U/L)     | 33      | 25384    | 0.000         | 98.2%          | Random | 13.98(12.13,15.83)  |
| GGT level (U/L)     | 16      | 10944    | 0.000         | 98.8%          | Random | 20.67(14.24, 27.10) |
| TBIL level(μmol/L)  | 26      | 23571    | 0.000         | 99.4%          | Random | 2.98(1.98,3.99)     |
| ALB level (g/L)     | 22      | 16574    | 0.000         | 99.9%          | Random | -4.52(-6.28, -2.75) |
| PT level (s)        | 13      | 9739     | 0.000         | 99.4%          | Random | 0.84(0.46,1.23)     |
| APTT level (s)      | 12      | 12119    | 0.000         | 99.7%          | Random | -1.12(-2.95, 0.71)  |
| INR                 | 5       | 5332     | 0.000         | 97.6%          | Random | 0.09(0.05, 0.13)    |
| mortality           | 5       | 3297     | 0.007         | 71.6%          | Random | 2.718(1.179,6.267)  |
| antiviral           | 7       | 1538     | 0.000         | 78.5%          | Random | 2.09(1.07,4.08)     |
| antibiotics         | 5       | 790      | 0.000         | 89.1%          | Random | 2.46(0.98,6.18)     |
| corticosteroid      | 7       | 564      | 0.014         | 65%            | Random | 1.64(1.07, 2.53)    |

Note: CLD: chronic liver disease; ALT: alanine aminotransferase; AST: aspartate aminotransferase; GGT: gamma-glutamyl

transferase; TBIL: total bilirubin; ALB: albumin; PT: prothrombin time; APTT: activated partial thromboplastin time; INR:

International Normalized Ratio.

Supplementary Table 4 Subgroup analyses and meta-analysis regression of included studies in the meta-analysis.

| Outcome      | Subgroups   | No.of studies         | Meta-analysis regression ( $P >  z $ ) | Effect size (Odds ratio/mean difference) | I <sup>2</sup> (%)  | P     |       |
|--------------|-------------|-----------------------|----------------------------------------|------------------------------------------|---------------------|-------|-------|
| Liver injury | overall     | 16                    | 0.548                                  | 3.25(2.19,4.84)                          | 82.3%               | 0.000 |       |
|              | country     | China                 | 14                                     | 0.819                                    | 3.37(2.17, 5.24)    | 84.5% | 0.000 |
|              |             | Abroad                | 2                                      |                                          | 2.70(1.57,4.64)     | 0.0%  | 0.666 |
|              | Study type  | cohort study          | 11                                     | 0.938                                    | 3.38(1.90,6.00)     | 87.0% | 0.000 |
|              |             | case-control study    | 5                                      |                                          | 2.88(2.11,3.94)     | 20.6% | 0.283 |
|              | Sample size | ≥175                  | 9                                      | 0.420                                    | 2.83 (1.65,4.84)    | 89.5% | 0.000 |
|              |             | <175                  | 7                                      |                                          | 3.88 (2.38,6.32)    | 31%   | 0.192 |
| ALT level    | overall     | 35                    | 0.078                                  | 12.87(10.52,15.23)                       | 99.2%               | 0.000 |       |
|              | country     | China                 | 24                                     | 0.476                                    | 14.73(11.92,17.54)  | 99.1% | 0.000 |
|              |             | Abroad                | 11                                     |                                          | 7.34(0.88, 13.79)   | 99.1% | 0.000 |
|              | Study type  | cross-sectional study | 2                                      | 0.875                                    | 21.13(8.20,34.05)   | 69.5% | 0.070 |
|              |             | case-control study    | 7                                      |                                          | 17.71(10.48,24.94)  | 94.7% | 0.000 |
|              |             | cohort study          | 26                                     |                                          | 11.38(8.83,13.92)   | 99.3% | 0.000 |
|              | Sample size | ≥175                  | 17                                     | 0.015                                    | 9.14(6.21,12.06)    | 99.5% | 0.000 |
| <175         |             | 18                    |                                        | 18.41(12.75, 24.07)                      | 97.6%               | 0.000 |       |
| AST level    | overall     | 33                    | 0.114                                  | 13.98(12.13,15.83)                       | 98.2%               | 0.000 |       |
|              | country     | China                 | 22                                     | 0.992                                    | 14.40(11.62, 17.18) | 98.6% | 0.000 |
|              |             | Abroad                | 11                                     |                                          | 17.71(8.33,15.09)   | 95.7% | 0.000 |
|              | Study type  | cross-sectional study | 2                                      | 0.596                                    | 21.22(13.61,28.83)  | 65.1% | 0.090 |
|              |             | case-control study    | 7                                      |                                          | 15.26(10.01,20.50)  | 87.9% | 0.000 |
|              |             | cohort study          | 24                                     |                                          | 13.11(11.13,15.09)  | 98.4% | 0.000 |
|              | Sample size | ≥175                  | 16                                     | 0.868                                    | 14.17(11.65,16.69)  | 99.0% | 0.000 |
| <175         |             | 17                    |                                        | 13.96(10.72,17.20)                       | 91.9%               | 0.000 |       |

Supplementary Table 4 (continued)

|             |             |                       |    |       |                     |                     |       |
|-------------|-------------|-----------------------|----|-------|---------------------|---------------------|-------|
| GGT level   | overall     |                       | 16 | 0.025 | 20.67(14.24, 27.10) | 98.8%               | 0.000 |
|             | country     | China                 | 11 | 0.664 | 19.80(12.47,27.13)  | 99.0%               | 0.000 |
|             |             | Abroad                | 5  |       | 23.04(10.62,35.45)  | 89.8%               | 0.000 |
|             | Study type  | cross-sectional study | 1  | 0.022 | 52.00(48.09,55.91)  | .%                  | -     |
|             |             | cohort study          | 12 |       | 19.32(12.88,25.77)  | 98.7%               | 0.000 |
|             |             | case-control study    | 3  |       | 7.96(-1.31,17.24)   | 65.3%               | 0.056 |
|             | Sample size | ≥175                  | 10 | 0.542 | 20.46(12.46,28.45)  | 99.2%               | 0.000 |
|             |             | <175                  | 6  |       | 21.37(9.57,33.16)   | 88.8%               | 0.000 |
|             | TBIL level  | overall               |    | 26    | 0.433               | 2.98(1.98,3.99)     | 99.4% |
| country     |             | China                 | 22 | 0.427 | 3.12(1.90,4.33)     | 99.5%               | 0.000 |
|             |             | Abroad                | 4  |       | 2.03(0.98, 3.08)    | 54.4%               | 0.087 |
| Study type  |             | cross-sectional study | 1  | 0.120 | 3.00(2.54, 3.46)    | .%                  | -     |
|             |             | cohort study          | 16 |       | 3.40(2.20,4.6)      | 99.5%               | 0.000 |
|             |             | case-control study    | 9  |       | 1.31(-0.27, 2.90)   | 92.6%               | 0.000 |
| Sample size |             | ≥175                  | 11 | 0.199 | 3.56(2.00,5.12)     | 99.7%               | 0.000 |
|             |             | <175                  | 15 |       | 2.05(1.29,2.81)     | 84.4%               | 0.000 |
| ALB level   |             | overall               |    | 22    | 0.113               | -4.52(-6.28, -2.75) | 99.9% |
|             | country     | China                 | 18 | 0.531 | -4.87(-6.16,-3.58)  | 99.6%               | 0.000 |
|             |             | Abroad                | 4  |       | -2.98(-6.95, 1.00)  | 99.9%               | 0.000 |
|             | Study type  | cohort study          | 17 | 0.266 | -4.00(-5.97,-2.03)  | 99.9%               | 0.000 |
|             |             | case-control study    | 5  |       | -6.28(-8.70,-3.87)  | 93.9%               | 0.000 |
|             | Sample size | ≥175                  | 9  | 0.864 | -4.02(-6.60, -1.45) | 100.0%              | 0.000 |
|             |             | <175                  | 13 |       | -4.83(-7.34,-2.33)  | 99.2%               | 0.000 |

Supplementary Table 4 (continued)

|           |             |                     |    |       |                    |       |       |
|-----------|-------------|---------------------|----|-------|--------------------|-------|-------|
| PT level  | overall     |                     | 13 | 0.288 | 0.84(0.46,1.23)    | 99.4% | 0.000 |
|           | Study type  | retrospective study | 11 | 0.447 | 0.81(0.35,1.27)    | 99.5% | 0.000 |
|           |             | prospective study   | 2  |       | 1.03(-0.04,2.11)   | 96.5% | 0.000 |
|           | Sample size | ≥175                | 5  | 0.311 | 0.99(0.30,1.67)    | 99.8% | 0.000 |
|           |             | <175                | 8  |       | 0.68(0.42,0.94)    | 85.8% | 0.000 |
|           | country     | China               | 9  | 0.861 | 0.86(0.46,1.25)    | 97.9% | 0.000 |
|           |             | Abroad              | 4  |       | 0.77(-0.14,1.67)   | 99.8% | 0.000 |
| INR       | overall     |                     | 5  | 0.000 | 0.09(0.05, 0.13)   | 97.6% | 0.000 |
|           | Sample size | ≥175                | 3  | 0.000 | 0.12(0.07,0.17)    | 97.5% | 0.000 |
|           |             | <175                | 2  |       | 0.05(0.03,0.07)    | 0.0%  | 0.712 |
|           | country     | China               | 4  | 0.000 | 0.07(0.03,0.11)    | 86.7% | 0.000 |
|           |             | Abroad              | 1  |       | 0.15(0.14, 0.16)   | -     | -     |
| Mortality | overall     |                     | 5  | 0.989 | 2.72(1.18,6.27)    | 71.6% | 0.007 |
|           | country     | China               | 3  | 0.727 | 3.18(0.97,10.44)   | 83.9% | 0.002 |
|           |             | Abroad              | 2  |       | 1.90(0.38, 9.44)   | 34.6% | 0.216 |
|           | Study type  | cohort study        | 4  | 0.322 | 1.82(1.07, 3.10)   | 8.4%  | 0.351 |
|           |             | case-control study  | 1  |       | 6.07(3.46,10.66)   | -     | -     |
|           | Sample size | ≥175                | 3  | 0.902 | 2.97(1.14 ,7.70)   | 83.7% | 0.002 |
|           |             | <175                | 2  |       | 1.67(0.17, 16.21)  | 34.8% | 0.215 |
| antiviral | overall     |                     | 7  | 0.048 | 2.09(1.07,4.08)    | 78.5% | 0.000 |
|           | country     | China               | 6  | 0.671 | 3.59 (1.64, 7.88)  | 77.9% | 0.001 |
|           |             | Abroad              | 1  |       | 1.85 (0.89, 3.87)  | .%    | -     |
|           | Study type  | cohort study        | 4  | 0.000 | 1.14 (0.78, 1.67)  | 18.0% | 0.301 |
|           |             | case-control study  | 3  |       | 4.30 (2.50, 7.38)  | 0%    | 0.527 |
|           | Sample size | ≥175                | 3  | 0.842 | 2.75 (0.73, 10.45) | 87.7% | 0.000 |

Supplementary Table 4 (continued)

|                |             |                    |   |       |                       |        |       |
|----------------|-------------|--------------------|---|-------|-----------------------|--------|-------|
|                |             | <175               | 4 |       | 1.75 (0.70, 4.40)     | 71.9%  | 0.029 |
| antibiotics    | overall     |                    | 5 | 0.000 | 2.46(0.98,6.18)       | 89.1%  | 0.000 |
|                | country     | China              | 4 | -     | 1.44 (0.82, 2.55)     | 71.4%, | 0.015 |
|                |             | Abroad             | 1 |       | 36.92 (10.54, 129.38) | .%     | -     |
|                | Study type  | cohort study       | 3 | 0.000 | 1.08 (0.77, 1.51)     | 0%     | 0.648 |
|                |             | case-control study | 2 |       | 10.41 (0.98, 110.77)  | 91.2%  | 0.001 |
|                | Sample size | ≥175               | 1 | 0.001 | 3.33 (1.76, 6.28)     | .%     | -     |
|                |             | <175               | 4 |       | 2.32 (0.75, 7.14)     | 90.3%  | 0.000 |
| corticosteroid | overall     |                    | 6 | 0.751 | 1.64(1.07, 2.53)      | 65%    | 0.000 |
|                | country     | China              | 4 | 0.145 | 1.33(0.98, 1.80)      | 33.2%  | 0.213 |
|                |             | Abroad             | 2 |       | 4.94(2.27, 10.73)     | 0%     | 0.853 |
|                | Study type  | cohort study       | 4 | 0.036 | 1.16(0.86, 1.57)      | 0%     | 0.530 |
|                |             | case-control study | 2 |       | 2.84(1.05, 7.69)      | 79.3%  | 0.028 |
|                | Sample size | ≥175               | 4 | 0.303 | 1.32(0.69, 2.53)      | 77.5%  | 0.035 |
|                |             | <175               | 2 |       | 2.04(1.00, 4.16)      | 66.7%  | 0.029 |

Note: CLD: chronic liver disease; ALT: alanine aminotransferase; AST: aspartate aminotransferase; GGT: gamma-glutamyl transferase; TBIL: total bilirubin; ALB:

albumin; PT: prothrombin time; APTT: activated partial thromboplastin time; INR: International Normalized Ratio.



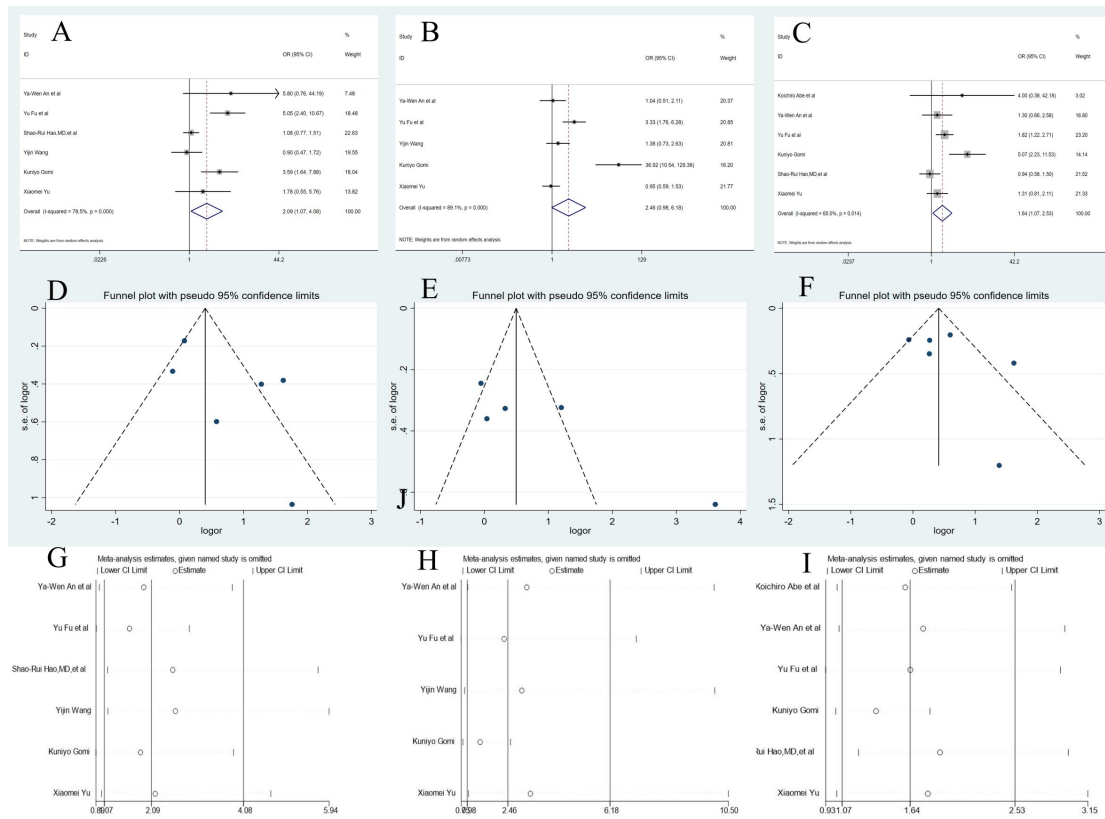

Supplementary Figure 1 The relationship between drugs and liver injury. (A-C) Forest plots of the included studies evaluating abnormal liver chemistries in patients receiving lopinavir or ritonavir, antibiotics, and corticosteroid treatments, respectively. (D-F) Funnel plot of the included studies evaluating abnormal liver chemistries in patients receiving lopinavir or ritonavir, antibiotics, and corticosteroid treatments, respectively. (G-I) Sensitivity analysis of the serum liver chemistries in patients receiving lopinavir or ritonavir, antibiotics, and corticosteroid treatments, respectively.
